# Supplementary material
Source: HighWire-hosted journal article supplement (https://cmaj.ca/highwire/filestream/151003/field_highwire_adjunct_files/0/230935-medsoc-1-at.pdf)
Supplement: 230935-medsoc-1-at.pdf [file 230935-medsoc-1-at.pdf]

## Appendix 1: Further Readings on the Right to Gender Self-Determination

### *Bioethics*

Ashley F. Adolescent Medical Transition is Ethical: An Analogy with Reproductive Health. *Kennedy Institute of Ethics Journal* 2022; 32: 127–171.

Ashley F. Transporting the Burden of Justification: The Unethicality of Transgender Conversion Practices. *The Journal of Law, Medicine & Ethics* 2022; 50: 425–42.

Rowland R. Integrity and Rights to Gender Affirming Healthcare. *Journal of Medical Ethics* 2002; 48: 832–837.

Katz AL, Webb SA. Informed Consent in Decision-Making in Pediatric Practice. *Pediatrics* 2016; 138: e20161485.

### *Legal Documents*

*The Yogyakarta Principles: Principles on the application of international human rights law in relation to sexual orientation and gender identity.* 2007. Available from: <https://yogyakartaprinciples.org/>

*The Yogyakarta Principles plus 10: Additional principles and state obligations on the application of international human rights law in relation to sexual orientation, gender identity, gender expression and sex characteristics to complement the Yogyakarta Principles.* 2017. Available from: <https://yogyakartaprinciples.org/>

United Nations, Human Rights Council. *The law of inclusion: Report of the Independent Expert on protection against violence and discrimination based on sexual orientation and gender identity, Victor Madrigal-Borloz.* 2021 Jun 3, A/HRC/47/27. Available from: <https://daccess-ods.un.org/access.nsf/Get?OpenAgent&DS=A/HRC/47/27&Lang=E>

United Nations, General Assembly. *Practices of exclusion: Report of the Independent Expert on protection against violence and discrimination based on sexual orientation and gender identity, Victor Madrigal-Borloz.* 2021 July 15, A/76/152. Available from: <https://daccess-ods.un.org/access.nsf/Get?OpenAgent&DS=A/76/152&Lang=E>

United Nations, General Assembly. *Protection against violence and discrimination based on sexual orientation and gender identity: Report of the Independent Expert on protection against violence and discrimination based on sexual orientation and gender identity, Victor Madrigal-Borloz.* 2018 July 12, A/73/152. Available from: <https://daccess-ods.un.org/access.nsf/Get?OpenAgent&DS=A/73/152&Lang=E>

United Nations. *Convention on the Rights of the Child.* Treaty No 27531. *Treaty Series*, 1989; 1577: 3–177.

*AC v Manitoba (Director of Child and Family Services)*, 2009 SCC 30 (Supreme Court of Canada).

## ***Health***

- shuster s m. *Trans Medicine: The Emergence and Practice of Treating Gender*. New York: New York University Press, 2021.
- Pearce R. *Understanding Trans Health: Discourse, Power and Possibility*. Bristol: Policy Press, 2018.
- Ashley F. The Clinical Irrelevance of “Desistance” Research for Transgender and Gender Creative Youth. *Psychology of Sexual Orientation and Gender Diversity* 2022; 9: 387–97.
- Horton C. “I Didn’t Want Him to Disappear” Parental Decision-Making on Access to Puberty Blockers for Trans Early Adolescents. *The Journal of Early Adolescence* 2022 (online first).
- Horton C. Experiences of Puberty and Puberty Blockers: Insights From Trans Children, Trans Adolescents, and Their Parents. *Journal of Adolescent Research* 2022 (online first).
- Horton C. “I Was Losing That Sense of Her Being Happy”—Trans Children and Delaying Social Transition. *LGBTQ+ Family: An Interdisciplinary Journal* 2022; 18: 187–203.
- Carlile A, Butteriss E, Pullen Sanfaçon A. “It’s like my kid came back overnight”: Experiences of trans and non-binary young people and their families seeking, finding and engaging with clinical care in England. *International Journal of Transgender Health* 2021; 22: 412–424.
- Bradford NJ, Syed M. Transnormativity and Transgender Identity Development: A Master Narrative Approach. *Sex Roles* 2019; 81: 306–325.
- Coleman E, Radix AE, Bouman WP, et al. Standards of Care for the Health of Transgender and Gender Diverse People, Version 8. *International Journal of Transgender Health* 2022; 23: S1–S259.
